# Supplementary material for: Supervised Exercise in Water: Is It a Viable Alternative in Overweight/Obese People with or without Type 2 Diabetes? A Pilot Study
Source: MDPI journal article supplement (doi:10.3390/nu14234963), 2022-11-23
Supplement: s1 [file s1]

**Table S1.** Anthropometric, blood pressure, and blood chemistry parameters values at baseline (T0) in all the sample (n = 38), overweight/obese with diabetes (n = 20), and over-weight/obese without diabetes (n = 18) subjects. Results are presented as mean and Standard Deviation (SD). Statistical significance was set for p values  $\leq 0.05$ .

| Variables                     | All    |       | overweight/obese<br>with diabetes |       | overweight/obese<br>without diabetes |       | T test |
|-------------------------------|--------|-------|-----------------------------------|-------|--------------------------------------|-------|--------|
|                               | Mean   | SD    | Mean                              | SD    | Mean                                 | SD    | p      |
| Weight (kg)                   | 65.96  | 47.62 | 72.59                             | 46.99 | 58.87                                | 48.08 | 0.268  |
| BMI (kg/m <sup>2</sup> )      | 36.77  | 6.21  | 37.44                             | 7.25  | 36.03                                | 4.89  | 0.494  |
| WC (cm)                       | 115.82 | 12.89 | 118.85                            | 15.62 | 112.44                               | 8.11  | 0.128  |
| SBP (mmhg)                    | 136.08 | 11.85 | 136.75                            | 13.11 | 135.29                               | 10.53 | 0.715  |
| DBP (mmhg)                    | 81.89  | 7.67  | 82.50                             | 7.86  | 81.18                                | 7.61  | 0.608  |
| Fasting blood glucose (mg/dL) | 108.95 | 30.37 | 122.10                            | 36.09 | 94.33                                | 11.02 | 0.003  |
| HbA1c (%)                     | 6.36   | 1.22  | 6.91                              | 1.46  | 5.78                                 | 0.48  | 0.004  |
| Total cholesterol (mg/dL)     | 211.00 | 51.41 | 197.70                            | 57.34 | 225.78                               | 40.48 | 0.093  |
| HDL (mg/dL)                   | 49.45  | 9.79  | 49.25                             | 10.65 | 49.67                                | 9.04  | 0.898  |
| LDL cholesterol (mg/dL)       | 132.41 | 42.30 | 114.72                            | 43.62 | 152.07                               | 31.48 | 0.005  |
| Triglycerides (mg/dL)         | 152.68 | 82.58 | 169.65                            | 92.95 | 133.83                               | 66.88 | 0.186  |
| Uric acid (mg/dL)             | 5.64   | 1.36  | 5.71                              | 1.44  | 5.59                                 | 1.33  | 0.810  |

**Legend:** BMI= Body mass index; WC = waist circumference; SBP = Systolic blood pressure; DBP = Diastolic blood pressure; HbA1c= glycosylated haemoglobin; Hdl= High Density Lipoprotein; LDL= Low Density Lipoprotein.
